# Supplementary material
Source: PubMed Central journal article supplement (PMC7124469)
Supplement: 156556_1_supp_447725_q2zy32.pdf [file 156556_1_supp_447725_q2zy32.pdf]

# SUPPLEMENTAL MATERIALS

## Phenotypic adaption of *Pseudomonas aeruginosa* by hacking siderophores produced by other microorganisms

Quentin PERRAUD<sup>a,b</sup>, Paola CANTERO<sup>c</sup>, Béatrice ROCHE<sup>a,b</sup>, Véronique GASSER<sup>a,b</sup>, Vincent P. NORMANT<sup>a,b</sup>, Lauriane KUHN<sup>d</sup>, Philippe HAMMANN<sup>d</sup>, Gaëtan L. A. MISLIN<sup>a,b</sup>, Laurence EHRET-SABATIER<sup>c</sup>, and Isabelle J. SCHALK<sup>a,b\*</sup>

<sup>a</sup> Université de Strasbourg, UMR7242, ESBS, Bld Sébastien Brant, F-67413 Illkirch, Strasbourg, France

<sup>b</sup> CNRS, UMR7242, ESBS, Bld Sébastien Brant, F-67413 Illkirch, Strasbourg, France

<sup>c</sup> Laboratoire de Spectrométrie de Masse BioOrganique, Université de Strasbourg, CNRS, IPHC UMR 7178, F-67000 Strasbourg, France

<sup>d</sup> Plateforme Proteomique Strasbourg - Esplanade, Institut de Biologie Moléculaire et Cellulaire, CNRS, FR1589, 15 rue Descartes, F-67084 Strasbourg Cedex.

**Table 1SM.** Strains and plasmids used in this study.

| Strain                                         | Collection ID | Relevant characteristics                                                                                                                                                                                                                                       | Source or references |
|------------------------------------------------|---------------|----------------------------------------------------------------------------------------------------------------------------------------------------------------------------------------------------------------------------------------------------------------|----------------------|
| <i>Pseudomonas aeruginosa</i>                  |               |                                                                                                                                                                                                                                                                |                      |
| PAO1                                           | PAO1          | Wild-type strain                                                                                                                                                                                                                                               | (1)                  |
| $\Delta pvdF\Delta pchA$                       | PAS283        | PAO1; <i>pvdF</i> and <i>pchA</i> chromosomally deleted                                                                                                                                                                                                        | (2)                  |
| $\Delta pvdF\Delta pchA\Delta pfeA$            | PAS294        | PAO1; <i>pvdF</i> , <i>pchA</i> and <i>pfeA</i> chromosomally deleted                                                                                                                                                                                          | (3)                  |
| $\Delta pvdF\Delta pchA\Delta fiuA\Delta foxA$ | PAS536        | PAO1; <i>pvdF</i> , <i>pchA</i> , <i>fiuA</i> and <i>foxA</i> chromosomally deleted                                                                                                                                                                            | This study           |
| <i>Escherichia coli</i>                        |               |                                                                                                                                                                                                                                                                |                      |
| TOP10                                          |               | <i>F</i> - <i>mcrA</i> $\Delta(mrr\text{-}hsdRMS\text{-}mcrBC)$ $\phi 80lacZ\Delta M15$ $\Delta lacX74$ <i>nupG</i> <i>recA1</i> <i>araD139</i> $\Delta(ara\text{-}leu)7697$ <i>galE15</i> <i>galK16</i> <i>rpsL(Str<sup>R</sup>)</i> <i>endA1</i> $\lambda$ - | Invitrogen           |
| <b>Plasmids</b>                                |               |                                                                                                                                                                                                                                                                |                      |
| pEXG2                                          | pEXG2         | allelic exchange vector with pBR origin, gentamicin resistance, <i>sacB</i>                                                                                                                                                                                    | (4)                  |
| pEXG2 $\Delta foxA$                            | pQUP8         | pEXG2 carrying the sequence to delete <i>foxA</i>                                                                                                                                                                                                              | This study           |
| pEXG2 $\Delta fiuA$                            | pQUP9         | pEXG2 carrying the sequence to delete <i>fiuA</i>                                                                                                                                                                                                              | This study           |

**Table 2SM. TBDTs present in the *P. aeruginosa* PAO1 genome.**

| Gene   | Name        | Known ligand                                 | Reference |
|--------|-------------|----------------------------------------------|-----------|
| PA4897 | <i>optI</i> | -                                            | (5)       |
| PA4837 | <i>cntO</i> | Pseudopaline                                 | (6)       |
| PA4710 | <i>phuR</i> | Haem                                         | (7)       |
| PA4675 | <i>chtA</i> | Aerobactin, Rhizobactin 1021,<br>Schizokinen | (8)       |
| PA4514 | <i>piuA</i> | BAL30072, MC-1                               | (9)       |
| PA4221 | <i>fptA</i> | Pyochelin                                    | (10)      |
| PA4168 | <i>fpvB</i> | Pyoverdine                                   | (11)      |
| PA4156 | <i>fvbA</i> | Vibriobactin                                 | (12)      |
| PA3901 | <i>fecA</i> | Citrate                                      | (13)      |
| PA3790 | <i>oprC</i> | -                                            | (14)      |
| PA3408 | <i>hasR</i> | HasA-haem                                    | (7)       |
| PA3268 | -           | -                                            | (14)      |
| PA2911 | -           | -                                            | (14)      |
| PA2688 | <i>pfeA</i> | Enterobactin                                 | (15)      |
| PA2590 | -           | -                                            | (14)      |
| PA2466 | <i>foxA</i> | Ferrioxamine                                 | (16)      |
| PA2398 | <i>fpvA</i> | Pyoverdine                                   | (17)      |
| PA2335 | <i>optO</i> | -                                            | (14)      |
| PA2289 | -           | -                                            | (14)      |
| PA2089 | -           | -                                            | (14)      |
| PA2070 | -           | -                                            | (14)      |
| PA2057 | <i>sppR</i> | -                                            | (18)      |
| PA1922 | <i>cirA</i> | -                                            | (14)      |
| PA1910 | <i>femA</i> | Mycobactins,<br>carboxymycobactins           | (5)       |
| PA1613 | -           | -                                            | (14)      |
| PA1365 | -           | -                                            | (14)      |
| PA1322 | <i>pfuA</i> | -                                            | (14)      |
| PA1302 | <i>hxuC</i> | -                                            | (14)      |
| PA1271 | -           | -                                            | (14)      |
| PA0931 | <i>pirA</i> | Enterobactin,<br>BAL30072, MC-1              | (9, 19)   |
| PA0781 | -           | -                                            | (14)      |
| PA0470 | <i>fuA</i>  | Ferrichrome                                  | (16)      |
| PA0434 | -           | -                                            | (14)      |
| PA0192 | -           | -                                            | (14)      |
| PA0151 | -           | -                                            | (14)      |

**Table 3SM.** Primers used for RT-qPCR analysis.

| <b>Name</b>     | <b>Gene</b>   | <b>Sequence</b>          |
|-----------------|---------------|--------------------------|
| <i>uvrD</i> F   | <i>uvrD</i>   | CTACGGTAGCGAGACCTACAACAA |
| <i>uvrD</i> R   | <i>uvrD</i>   | GCGGCTGACGGTATTGGA       |
| <i>GAPDH</i> F  | <i>GAPDH</i>  | TGCACCACCAACTGCTTAGC     |
| <i>GAPDH</i> R  | <i>GAPDH</i>  | GGCATGGACTGTGGTCATGAG    |
| <i>fiuA</i> F   | <i>fiuA</i>   | GCCGCGACAAGAAGTTCAG      |
| <i>fiuA</i> R   | <i>fiuA</i>   | ACGACTCCGCATAGGAGATATAGG |
| <i>foxA</i> F   | <i>foxA</i>   | AAGGGCTCGGATACCCAGTT     |
| <i>foxA</i> R   | <i>foxA</i>   | CGTTGGGATCGTGTGCA        |
| <i>femA</i> F   | <i>femA</i>   | CATTCCGAAGACCAATGAAACC   |
| <i>femA</i> R   | <i>femA</i>   | TGACCTGCACGCGATCCT       |
| <i>pfeA</i> F   | <i>pfeA</i>   | GCCGAGACCAGCGTGAAC       |
| <i>pfeA</i> R   | <i>pfeA</i>   | GGCCGGATTTCGATCTTGTT     |
| <i>fvbA</i> F   | <i>fvbA</i>   | CCAGCTACCGCTTCAACGA      |
| <i>fvbA</i> R   | <i>fvbA</i>   | CCGGTTTTCTGCATGTAGGT     |
| <i>fpvA</i> F   | <i>fpvA</i>   | AGCCGCCTACCAGGATAAGC     |
| <i>fpvA</i> R   | <i>fpvA</i>   | TGCCGTAATAGACGCTGGTTT    |
| <i>fptA</i> F   | <i>fptA</i>   | GCGCCTGGGCTACAAGATC      |
| <i>fptA</i> R   | <i>fptA</i>   | CCGTAGCGGTTGTTCCAGTT     |
| <i>PA0434</i> F | <i>PA0434</i> | CGCTACGTGTCCTCGGTGTAC    |
| <i>PA0434</i> R | <i>PA0434</i> | GGAAAGTCCCGTAGACCGTGTA   |
| <i>piuA</i> F   | <i>piuA</i>   | CAGCGCGGCTTATGTGTTC      |
| <i>piuA</i> R   | <i>piuA</i>   | CCGAGATTCAGCTCCCATTG     |
| <i>hasR</i> F   | <i>hasR</i>   | AGCGCCTGCAGTTCAGCTA      |
| <i>hasR</i> R   | <i>hasR</i>   | GTTCTCGGTGTTGAGCATGTTG   |
| <i>phuR</i> F   | <i>phuR</i>   | GGTCGAACTGCCAACGA        |
| <i>phuR</i> R   | <i>phuR</i>   | TACGATGTCCGGATCGACGTA    |
| <i>piv</i> F    | <i>piv</i>    | GCGTGGGCCTGAAAACG        |
| <i>piv</i> R    | <i>piv</i>    | CGATCCATTCGAGGGTTGTC     |
| <i>toxA</i> F   | <i>toxA</i>   | CCCGGCGAAGCATGAC         |
| <i>toxA</i> R   | <i>toxA</i>   | GGGAAATGCAGGCGATGA       |
| <i>aprA</i> F   | <i>aprA</i>   | AACCAGAAGATCAACCTCAACGA  |
| <i>aprA</i> R   | <i>aprA</i>   | TCGACACATTGCCCTTCAAC     |
| <i>exoY</i> F   | <i>exoY</i>   | AATGGATGGCGGAGCCTATA     |
| <i>exoY</i> R   | <i>exoY</i>   | CAAGGCGTTGCCGAGAGAT      |

**Table 4SM.** Primers used for the construction of the  $\Delta pvdF\Delta pchA\Delta fiuA\Delta foxA$  strain.

| Name          | Gene        | Sequence                                                                                          |
|---------------|-------------|---------------------------------------------------------------------------------------------------|
| FiuAatg-672F  | <i>fiuA</i> | AGCAGCGCGAGCTGACCCTCCCGGATGCC                                                                     |
| FiuAoverlapR  | <i>fiuA</i> | TGCGGGGCTCCTGGATGGAAACGAGTCTCAATGCC                                                               |
| FiuAoverlapF  | <i>fiuA</i> | GGCATTGAGACTCGTTTTCCATCCAGGAGCCCCGAGCGACGCGTCACAGGTGCGTAACGGCGGATAAC                              |
| FiuAstop+639R | <i>fiuA</i> | TCGGCGACAGCCGGATCCTCGTCTGAAGGCG                                                                   |
| FoxAatg-694F  | <i>foxA</i> | TGCGCTACGACGCCGGCCAGCGCCTGATC                                                                     |
| FoxAoverlapR  | <i>foxA</i> | GAACGGGATCCGTTGGAGTCGTTGAAGGGTGTCAATCG                                                            |
| FoxAoverlapF  | <i>foxA</i> | CGATTGAACACCCTTCAACGACTCCAACGGATCCGTTCTTCTGACCGTCCACCCGGGCCCGGCGAGCGGTAGGCGTTGCCGCGCTTGATCTTCCAGG |
| FoxAstop+661R | <i>foxA</i> |                                                                                                   |

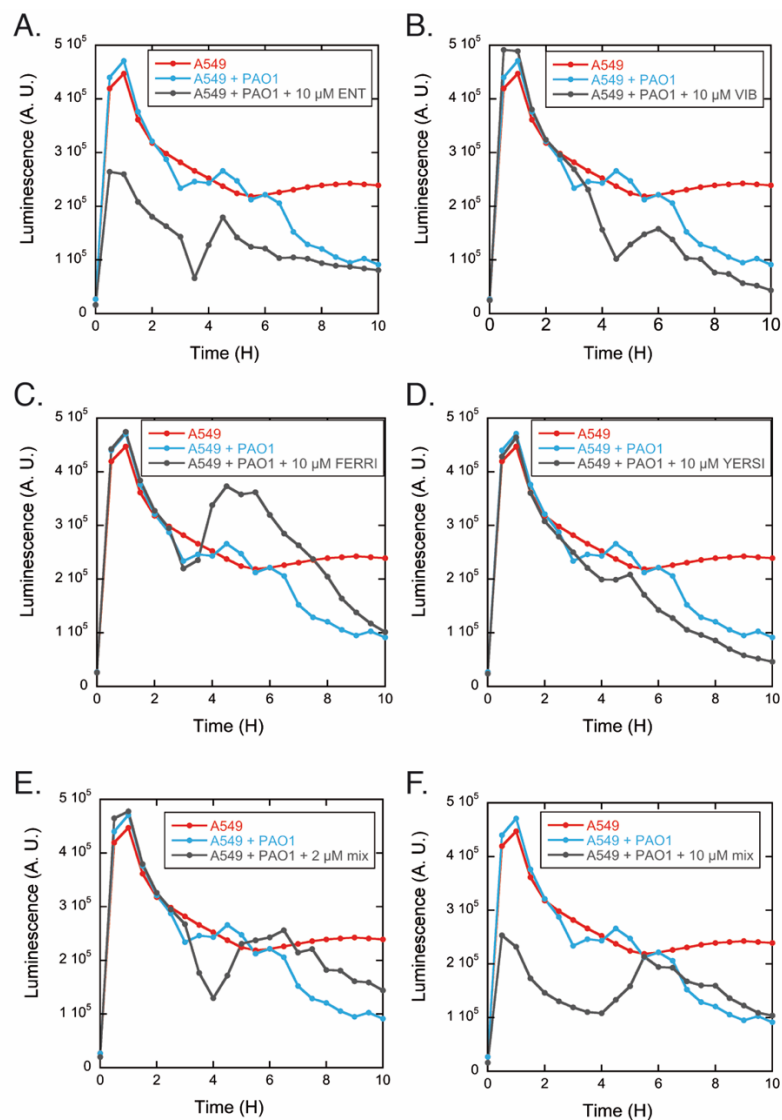

**Figure 1SM.** A549 cell viability in the presence or absence of *P. aeruginosa* and/or siderophores. The Real Time-Glo™ MT cell viability kit (Promega™) was used as described in Materials and Methods. Cell viability is represented as a function of luminescence signal (A. U., arbitrary unit). Viability of the A549 cells alone is

represented by the red dots, infected cell viability by the blue dots, and the viability of infected cells in the presence of siderophore by grey dots.

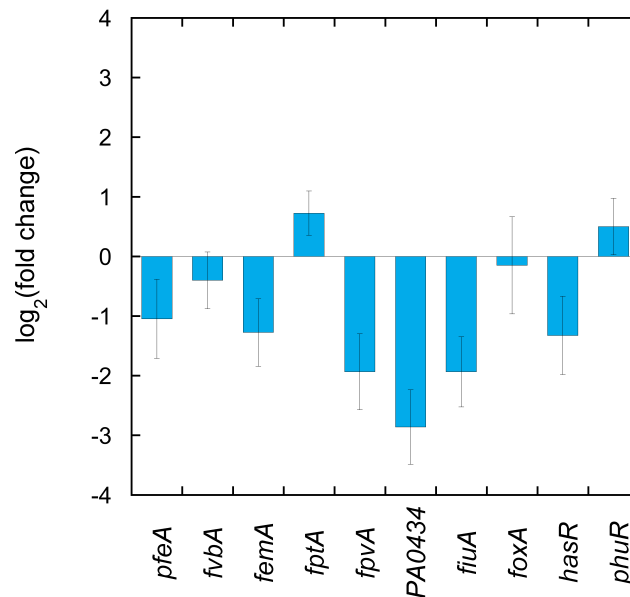

**Figure 2SM: Analysis of changes in the transcription of TBBD genes involved in iron-uptake pathways in *P. aeruginosa* cells in RPMI medium in the presence of A549 epithelial cells during 3 h versus those of bacteria grown as in figure 4, i.e. for 8 h in RPMI medium.** The data were normalized relative to the reference gene *uvrD* and are representative of three independent experiments. Results are given as the ratio between the values obtained in RPMI in the presence of epithelial cells and those for bacteria grown as in Figure 3 and 4, for 8 h in RPMI without epithelial cells.

## REFERENCES

1. Stover, C. K., Pham, X. Q., Erwin, A. L., Mizoguchi, S. D., Warrenner, P., Hickey, M. J., Brinkman, F. S., Hufnagle, W. O., Kowalik, D. J., Lagrou, M., Garber, R. L., Goltry, L., Tolentino, E., Westbrook-Wadman, S., Yuan, Y., Brody, L. L., Coulter, S. N., Folger, K. R., Kas, A., Larbig, K., Lim, R., Smith, K., Spencer, D., Wong, G. K., Wu, Z., Paulsen, I. T., Reizer, J., Saier, M. H., Hancock, R. E., Lory, S., and Olson, M. V. (2000) Complete genome sequence of *Pseudomonas aeruginosa* PAO1, an opportunistic pathogen. *Nature* 406, 959–64
2. Gasser, V., Baco, E., Cunrath, O., August, P. S., Perraud, Q., Zill, N., Schleberger, C., Schmidt, A., Paulen, A., Bumann, D., Mislin, G. L. A., and Schalk, I. J. (2016) Catechol siderophores repress the pyochelin pathway and activate the enterobactin pathway in *Pseudomonas aeruginosa*: an opportunity for siderophore-antibiotic conjugates development. *Environ. Microbiol.* 18, 819–832
3. Paulen, A., Gasser, V., Hoegy, F., Perraud, Q., Pesset, B., Schalk, I. J., and Mislin, G. L. A. (2015) Synthesis and antibiotic activity of oxazolidinone-catechol conjugates against *Pseudomonas aeruginosa*. *Org. Biomol. Chem.* 13, 11567–11579
4. Rietsch, A., Vallet-Gely, I., Dove, S. L., and Mekalanos, J. J. (2005) ExsE, a secreted regulator of type III secretion genes in *Pseudomonas aeruginosa*. *Proc. Natl. Acad. Sci. U.S.A.* 102, 8006–8011
5. Llamas, M. A., Mooij, M. J., Sparrius, M., Vandenbroucke-Grauls, C. M., Ratledge, C., and Bitter, W. (2008) Characterization of five novel *Pseudomonas aeruginosa* cell-surface signalling systems. *Molecular microbiology* 67, 458–72
6. Lhospice, S., Gomez, N. O., Ouerdane, L., Brutesco, C., Ghsssein, G., Hajjar, C., Liratni, A., Wang, S., Richaud, P., Bleves, S., Ball, G., Borezée-Durant, E., Lobinski, R., Pignol, D., Arnoux, P., and

- Voulhoux, R. (2017) *Pseudomonas aeruginosa* zinc uptake in chelating environment is primarily mediated by the metallophore pseudopaline. *Sci Rep* 7, 17132
7. Smith, A. D., and Wilks, A. (2015) Differential contributions of the outer membrane receptors PhuR and HasR to heme acquisition in *Pseudomonas aeruginosa*. *J. Biol. Chem.* 290, 7756–7766
  8. Cuiv, P. O., Clarke, P., and O’Connell, M. (2006) Identification and characterization of an iron-regulated gene, *chtA*, required for the utilization of the xenosiderophores aerobactin, rhizobactin 1021 and schizokinen by *Pseudomonas aeruginosa*. *Microbiology* 152, 945–54
  9. Moynié, L., Luscher, A., Rolo, D., Pletzer, D., Tortajada, A., Weingart, H., Braun, Y., Page, M. G. P., Naismith, J. H., and Köhler, T. (2017) Structure and Function of the PiuA and PirA Siderophore-Drug Receptors from *Pseudomonas aeruginosa* and *Acinetobacter baumannii*. *Antimicrob. Agents Chemother.* 61,
  10. Ankenbauer, R. G., and Quan, H. N. (1994) FptA, the Fe(III)-pyochelin receptor of *Pseudomonas aeruginosa*: a phenolate siderophore receptor homologous to hydroxamate siderophore receptors. *J Bacteriol* 176, 307–19
  11. Ghysels, B., Dieu, B. T., Beatson, S. A., Pirmay, J. P., Ochsner, U. A., Vasil, M. L., and Cornelis, P. (2004) FpvB, an alternative type I ferripyoverdine receptor of *Pseudomonas aeruginosa*. *Microbiology* 150, 1671–80
  12. Elias, S., Degtyar, E., and Banin, E. (2011) FvbA is required for vibriobactin utilization in *Pseudomonas aeruginosa*. *Microbiology* 157, 2172–80
  13. Marshall, B., Stintzi, A., Gilmour, C., Meyer, J.-M., and Poole, K. (2009) Citrate-mediated iron uptake in *Pseudomonas aeruginosa*: involvement of the citrate-inducible FecA receptor and the FeoB ferrous iron transporter. *Microbiology (Reading, Engl.)* 155, 305–315
  14. Cornelis, P., and Bodilis, J. (2009) A survey of TonB-dependent receptors in fluorescent pseudomonads. *Environmental microbiology reports* 1, 256–62
  15. Poole, K., Young, L., and Neshat, S. (1990) Enterobactin-mediated iron transport in *Pseudomonas aeruginosa*. *J Bacteriol* 172, 6991–6
  16. Llamas, M. A., Sparrius, M., Kloet, R., Jimenez, C. R., Vandenbroucke-Grauls, C., and Bitter, W. (2006) The heterologous siderophores ferrioxamine B and ferrichrome activate signaling pathways in *Pseudomonas aeruginosa*. *Journal of bacteriology* 188, 1882–91
  17. Poole, K., Neshat, S., Krebs, K., and Heinrichs, D. E. (1993) Cloning and nucleotide sequence analysis of the ferripyoverdine receptor gene *fpvA* of *Pseudomonas aeruginosa*. *J Bacteriol* 175, 4597–604
  18. Pletzer, D., Braun, Y., and Weingart, H. (2016) Swarming motility is modulated by expression of the putative xenosiderophore transporter SppR-SppABCD in *Pseudomonas aeruginosa* PA14. *Antonie Van Leeuwenhoek* 109, 737–753
  19. Ghysels, B., Ochsner, U., Mollman, U., Heinisch, L., Vasil, M., Cornelis, P., and Matthijs, S. (2005) The *Pseudomonas aeruginosa* *pirA* gene encodes a second receptor for ferrienterobactin and synthetic catecholate analogues. *FEMS microbiology letters* 246, 167–74
  20. Raymond, K. N., Dertz, E. A., and Kim, S. S. (2003) Enterobactin: an archetype for microbial iron transport. *Proceedings of the National Academy of Sciences of the United States of America* 100, 3584–8
  21. Albrecht-Gary, A. M., Blanc, S., Rochel, N., Ocacktan, A. Z., and Abdallah, M. A. (1994) Bacterial iron transport: coordination properties of pyoverdine PaA, a peptidic siderophore of *Pseudomonas aeruginosa*. *Inorg. Chem.* 33, 6391–6402
  22. Anderegg, G., L’Eplattenier, F., and Schwarzenbach, G. (1963) Hydroxamatkomplexe III. Eisen(III)-Austausch zwischen Sideraminen und Komplexonen. Diskussion der Bildungskonstanten der Hydroxamatkomplexe. *Helvetica Chimica Acta* 46, 1409–1422
  23. Brandel, J., Humbert, N., Elhabiri, M., Schalk, I. J., Mislin, G. L. A., and Albrecht-Garry, A.-M. (2012) Pyochelin, a siderophore of *Pseudomonas aeruginosa*: Physicochemical characterization of the iron(III), copper(II) and zinc(II) complexes. *Dalton Trans* 41, 2820–34
